# Supplementary material for: Antipsychotic- and Anxiolytic-like Properties of a Multimodal Compound JJGW08 in Rodents
Source: MDPI journal article supplement (doi:10.3390/ijms232415929), 2022-12-14

## Supplementary data

**Figure S1.** Functional analysis to 5-HT<sub>1A</sub> receptor.

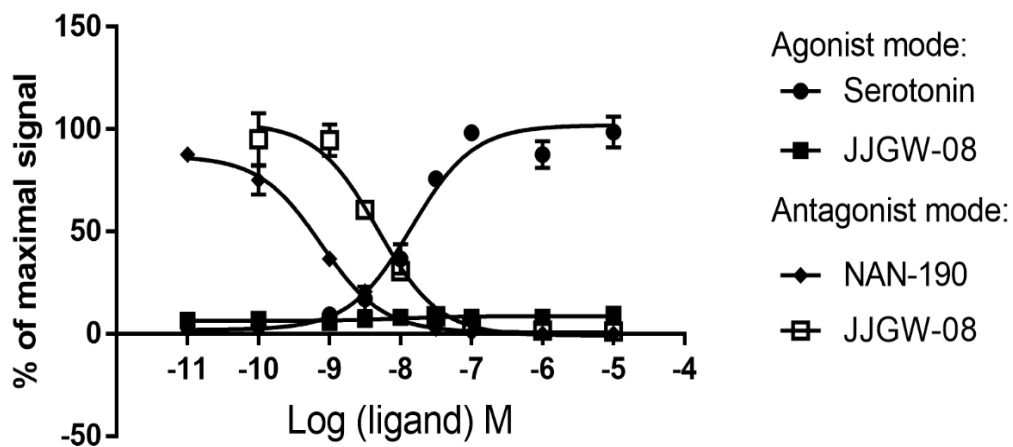

**Figure S2.** Functional analysis to 5-HT<sub>2A</sub> receptor.

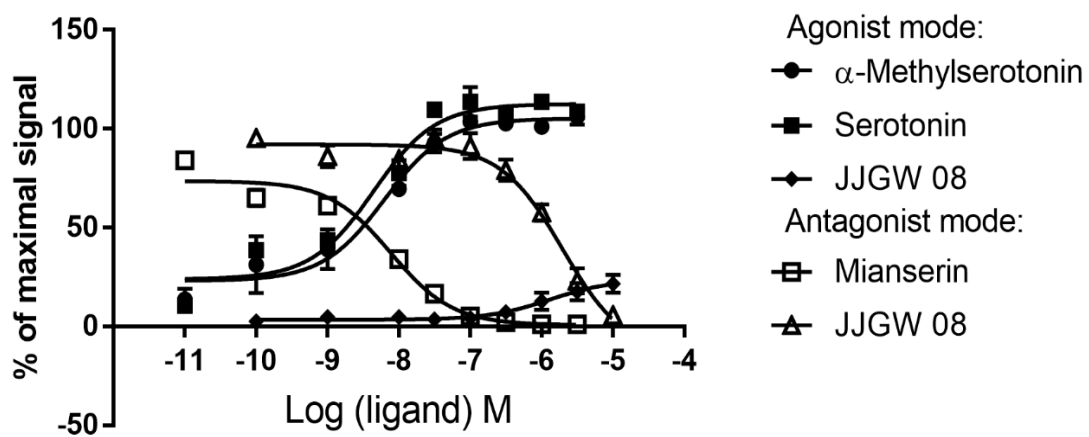

**Figure S3.** Functional analysis to 5-HT<sub>7</sub> receptor.

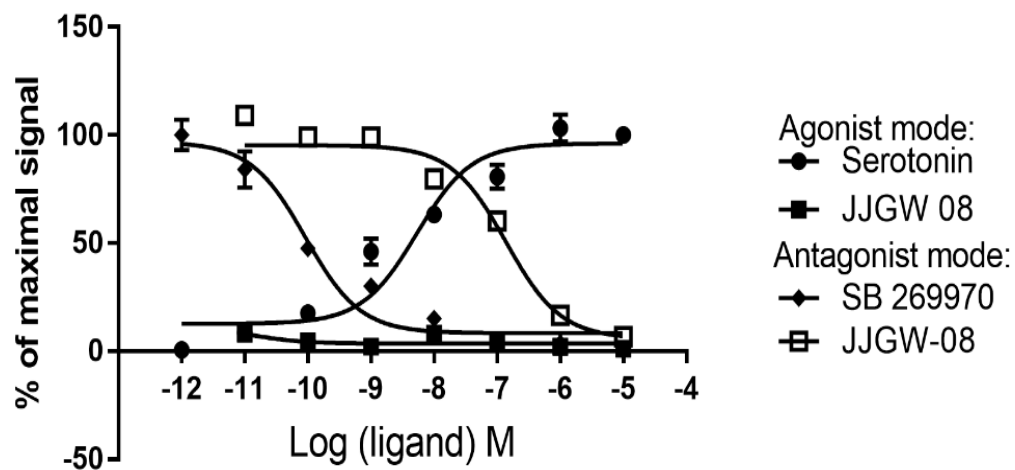

**Figure S4.** Functional analysis to D<sub>2</sub> receptor.

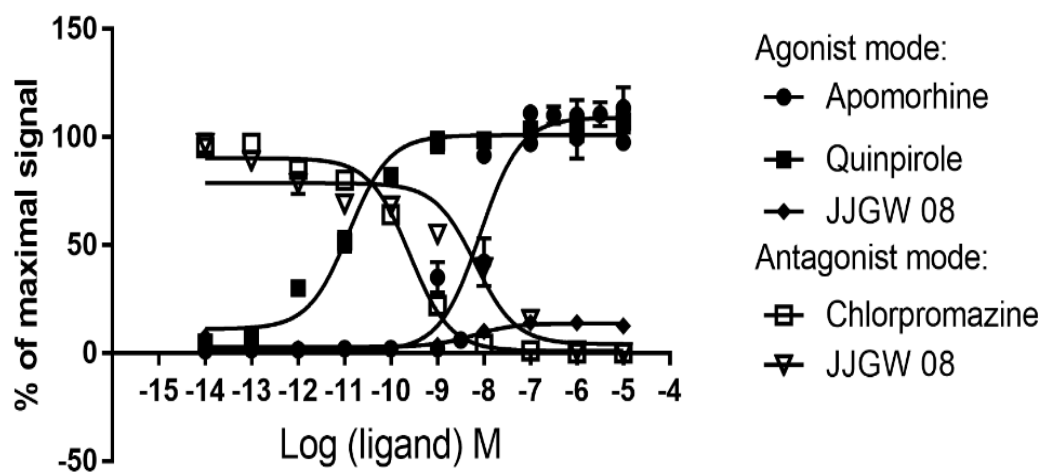

Supplement: s1 [file s1]
